# Supplementary material for: Collaboration of RAG2 with RAG1-like proteins during the evolution of V(D)J recombination
Source: PubMed Central journal article supplement — Genes Dev. 2016 Apr 15;30(8):909–17. doi: 10.1101/gad.278432.116 (PMC4840297; doi:10.1101/gad.278432.116), 2016-04-15
Supplement: supp_gad.278432.116_Supp_Figure_S3.pdf [file supp_gad.278432.116_Supp_Figure_S3.pdf]

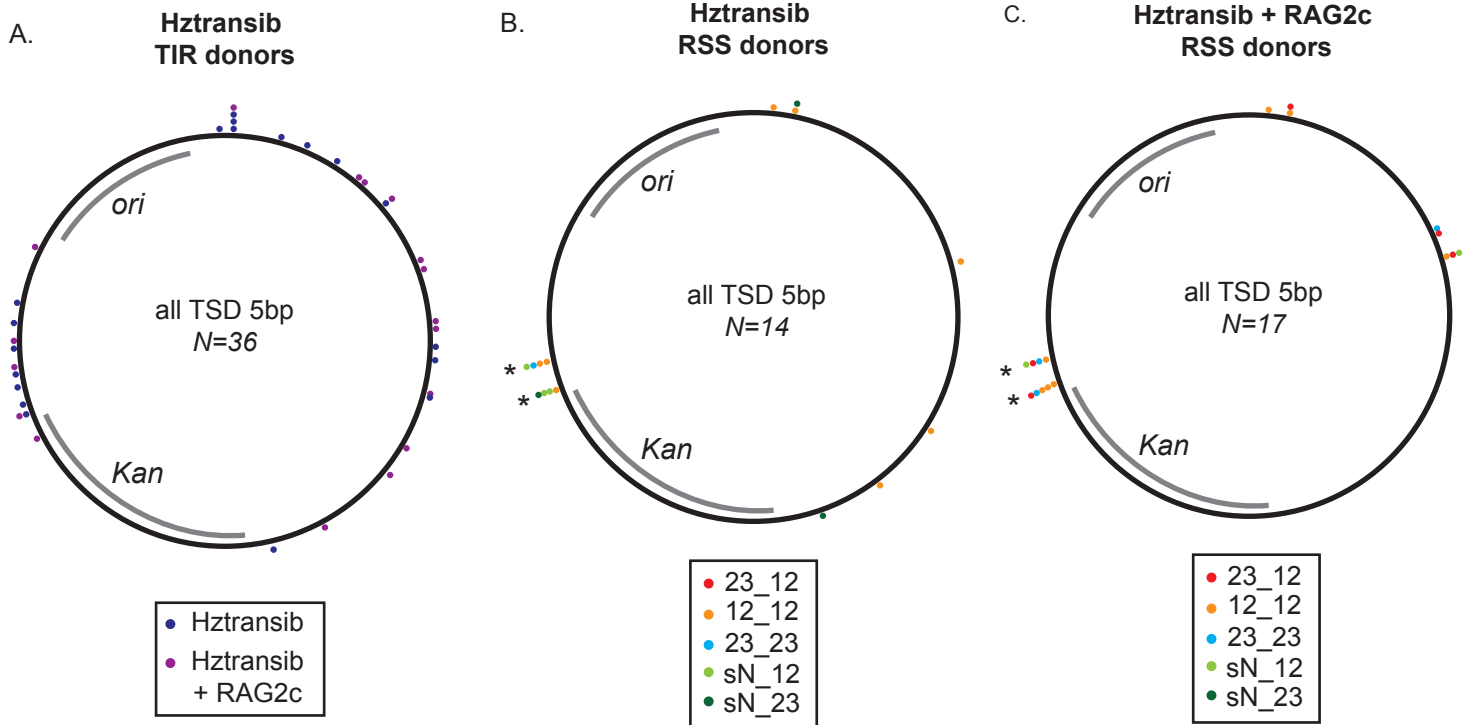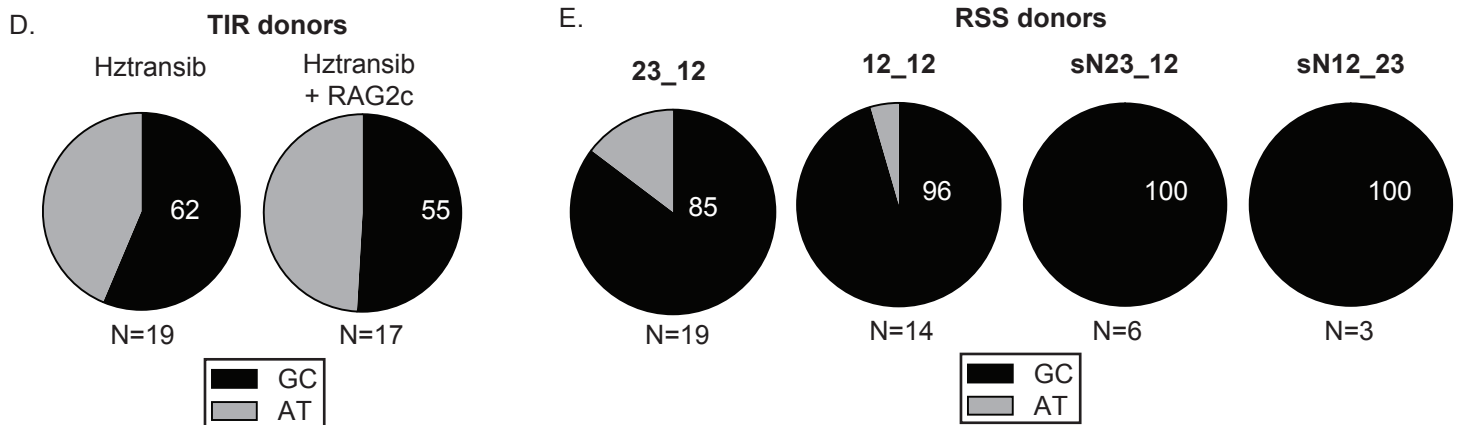

**F.**

```

Hztransib 1  -----MDLQNP E--AAAK I K EMLNKP 19
RAG1core 384 VHINKGG-RPRQHLLSLTRRAQKHRLRELKIQVKEFADKEEGGDVKAVCLTLFLLALRARNEHQADEL--EA-IMQ 457

Hztransib 20 APSTIFSP EKA LGLLLSLK LSKWQYITLRET-----TIR EGSK E IY P S Y Y K V Q K----- 68
RAG1core 458 GRGSLQPAVCLA I RVNTFLS CSQYHKMYRTVKAITGRQIFQPLHALRNAEKVLLPGYHPFEWQPPLKNVSSRT--- 531

Hztransib 69 -----AKLQCYP PKAFVTVTDSSAKIALQALLDLTVNRIFETIRSPD---AIQNKQLILISKWG 124
RAG1core 532 -----DVG I IDGLS-GLASSVDEY-PVDTIAKRFYDSALVSA LMDM-EEDI L EGMRSQDLLDDYL-NGPFTVVVKES 599

Hztransib 125 FDGASNQ SRY KQNI ESGQDD-----S S I F M T S L V P L K L T A D G D T V W V N P K P C S P M Y C R P V Q F S F V K E T K D V V----- 191
RAG1core 600 CDGMGDV S E -K H G S G P A V P E K A V R F S F T V M R I T I E H - G - S Q N V K V F E E P K P N S E L C K P L C L M L A D E S D H E T L T A I L 673

Hztransib 192 ---I N E K T A M D N E I E A L V P S K C Q G H E I S H - - K L M M T M I D G K I C T Y - - - L S E A K S N A A C Y L C L A K P T E M N K L D V I A S K 260
RAG1core 674 S P L I A E R E A M K S S E L T L E M - - - G C I P R T F K F I F R G T G Y D E K L V R E V E G L E A S G S V Y I C T L C D T T R L E A S Q N L V F H S I 747

Hztransib 261 T-----I S S G V Y E F G-----L S T L H A R I N V M E C L L H I A Y R - - L D F K K W S A 298
RAG1core 748 T R S H A E N L Q R Y E V W R S N P Y H E S V E E L R D R V K G V S A K P F I E T V P S - - I D A L H C D I G N A A E F Y K I F Q L E I G E V Y K H P N 821

Hztransib 299 -GEGHQ E L L H S R K K L I Q D R F K D D L N L L - I D I V K Q G S G T T N D G N T A R R F F E F P D K T A A I T G F D - - - E D L I R - - - - R F 366
RAG1core 822 A S K - - E E R K - - - - - R W Q A T L D K H L R K R M N L K P I M R M N G N F A R K L M T Q E T V D A V C E L I P S E E R H E A L R E L M D L Y 887

Hztransib 367 S V I L Q A I T S - - G - I I D V P K F K E Y - - - A G T T A E K Y V E L Y D W Y - - - M S T V H K L L I H G G D I I - A E N A I V P I G S L S E E A 434
RAG1core 888 L K M K P V W R S S C P A K E C P E S L C Q Y S F N S Q R F A E L L S T K F K Y R Y E G K I T N Y F H K T L A H V P E I I - - - E R D G S I C A W A S E G 961

Hztransib 435 S E A R N K D F R R F R E H H S R K K S R Q A S N E D I L N M L I S S D P L I S F T R P K L D A H K R Q T Y F K E T V E L L Q L Q D Q E A P T E F 508
RAG1core 962 N E S G N K L F R R F R K M N A R Q S - K C Y E M E D V L K H H W L Y T S K Y L Q K F M N - - - A H N A L K - - - - - - - - - - - - - - - 1001
    
```
