# Supplementary figures and images for: Collaboration of RAG2 with RAG1-like proteins during the evolution of V(D)J recombination
Source: PubMed Central journal article supplement — Genes Dev. 2016 Apr 15;30(8):909–17. doi: 10.1101/gad.278432.116 (PMC4840297; doi:10.1101/gad.278432.116), 2016-04-15

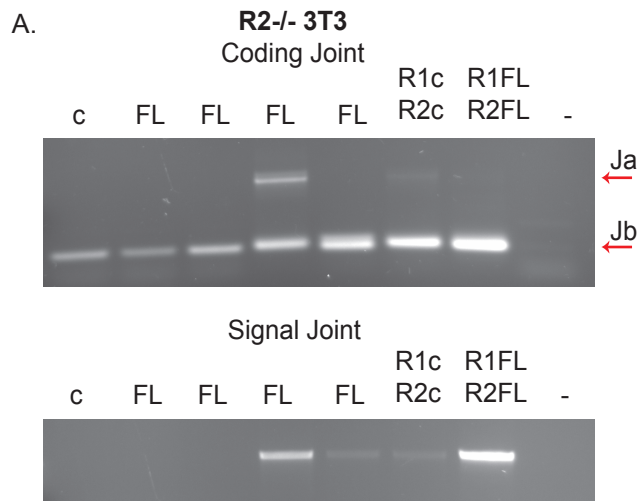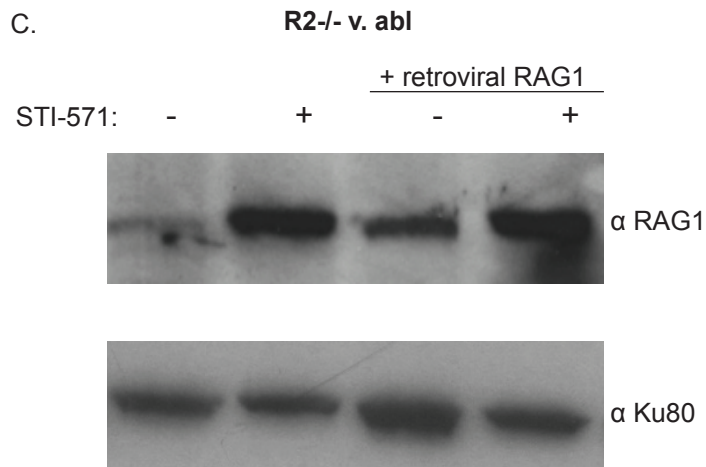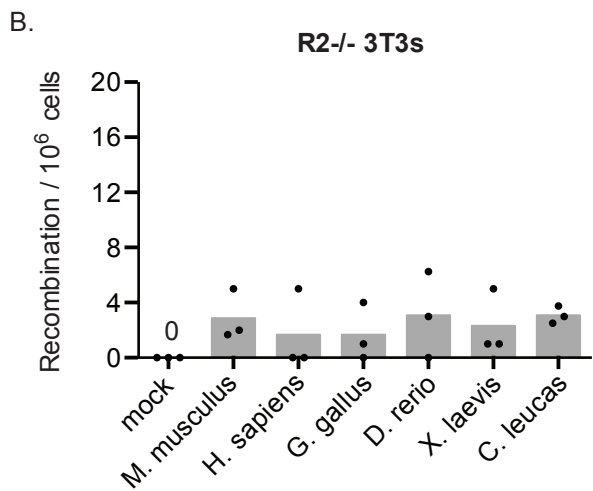

Supplement: supp_gad.278432.116_Supp_Figure_S1.pdf [file supp_gad.278432.116_Supp_Figure_S1.pdf]

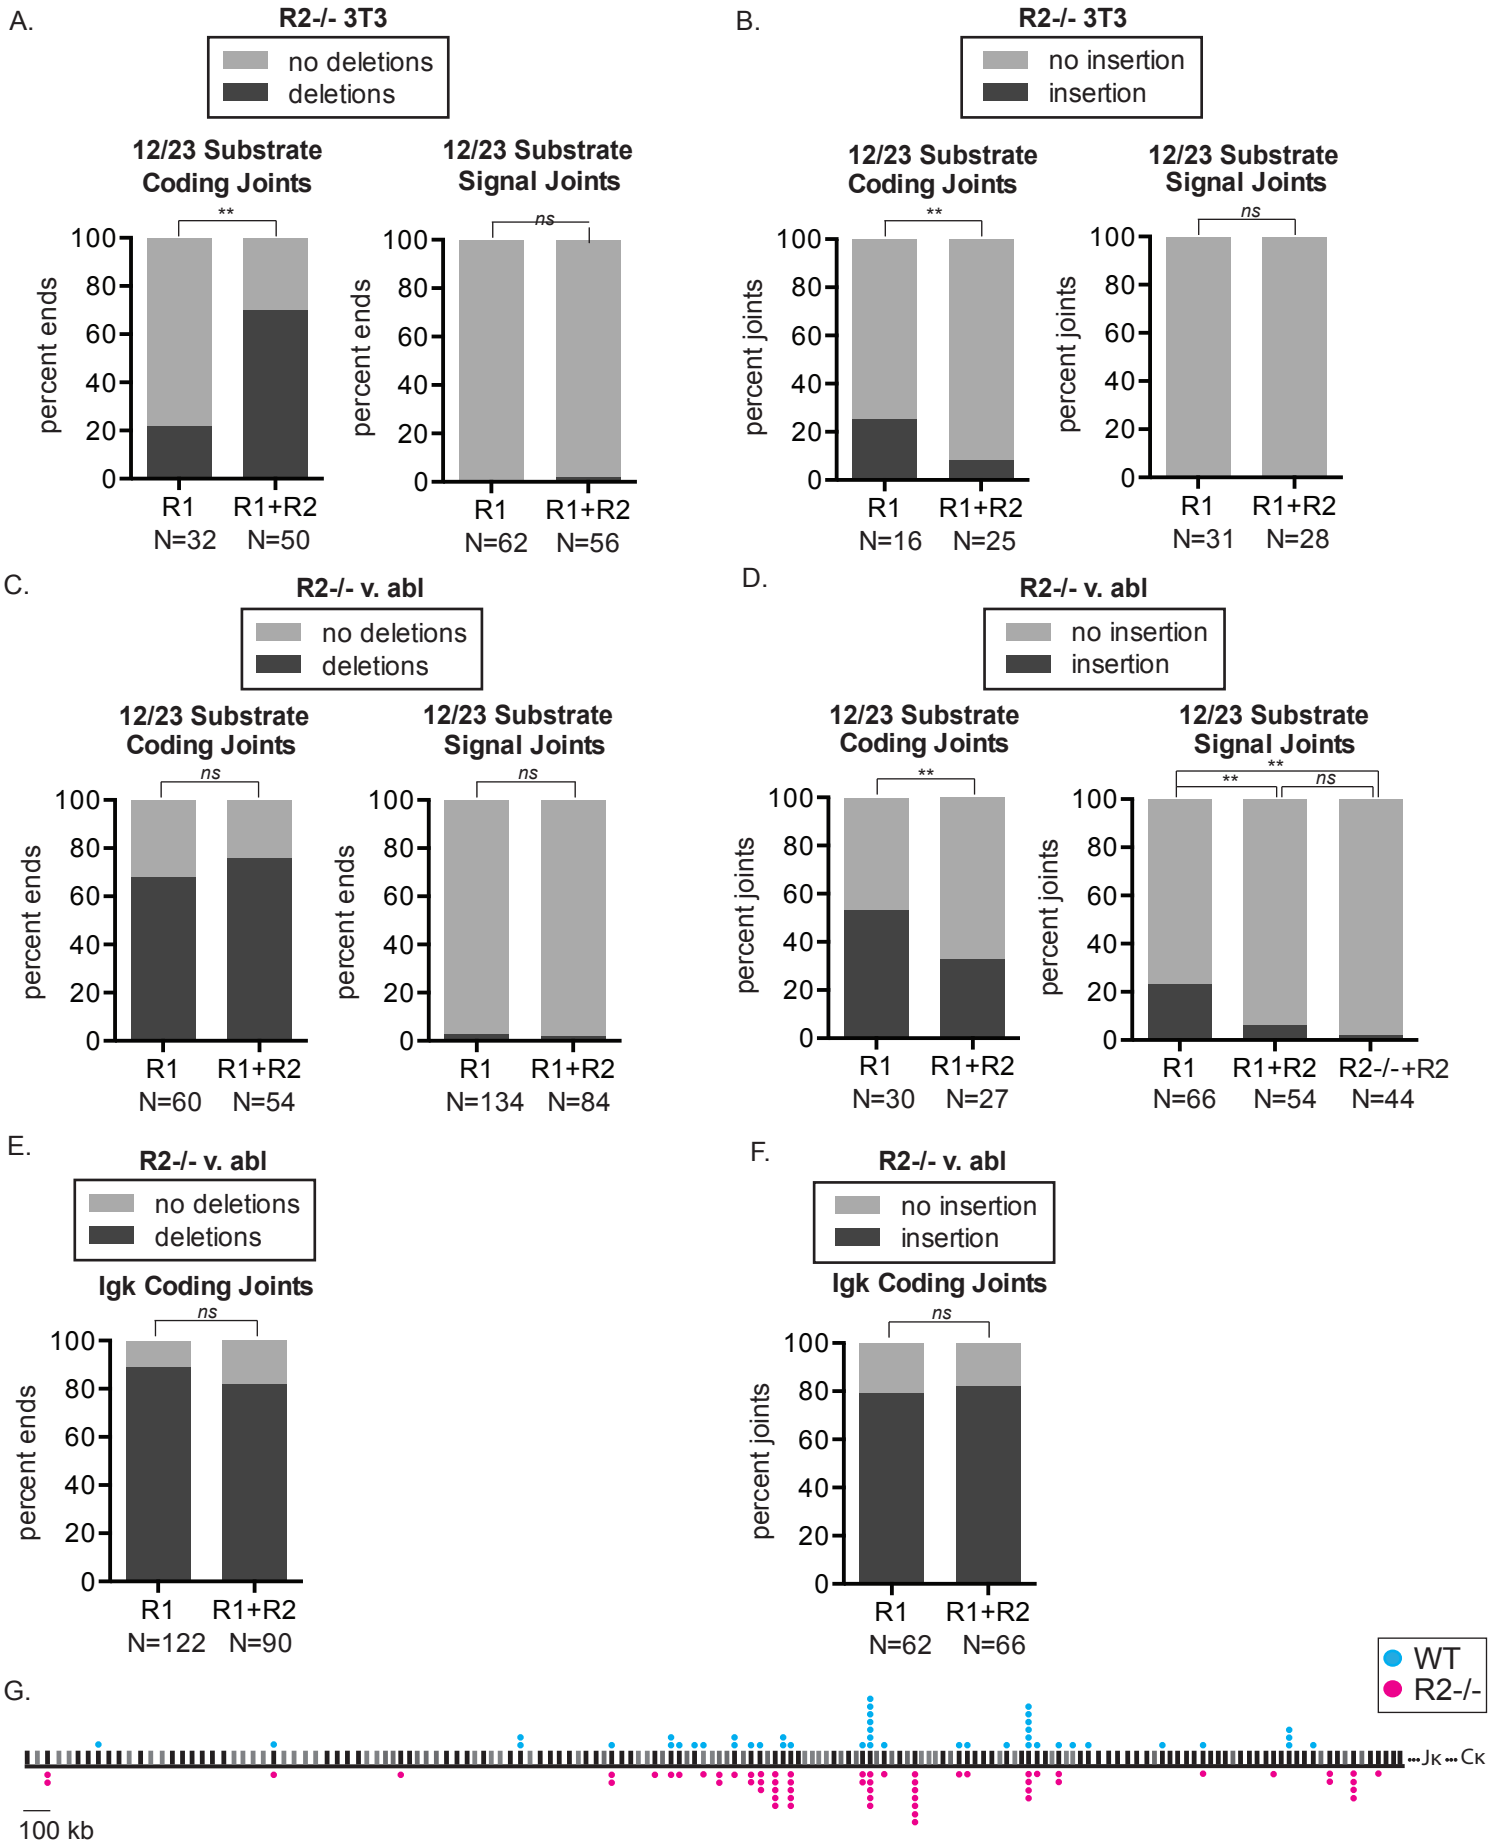

Supplement: supp_gad.278432.116_Supp_Figure_S2.pdf [file supp_gad.278432.116_Supp_Figure_S2.pdf]
